# Supplementary figures and images for: Evaluation of novelN′-(3-hydroxybenzoyl)-2-oxo-2H-chromene-3-carbohydrazide derivatives as potential HIV-1 integrase inhibitors
Source: Royal Society of Chemistry journal article supplement (doi:10.1039/c8md00328a), 2018-12-10

# Dose response curves for 8a-o

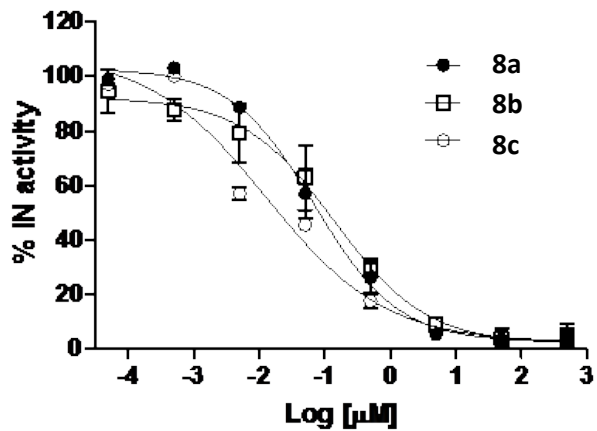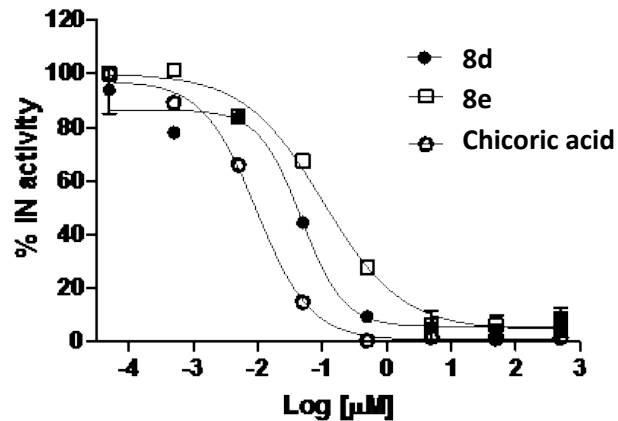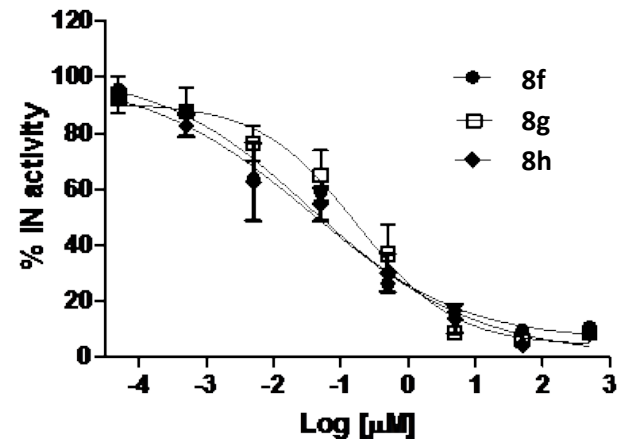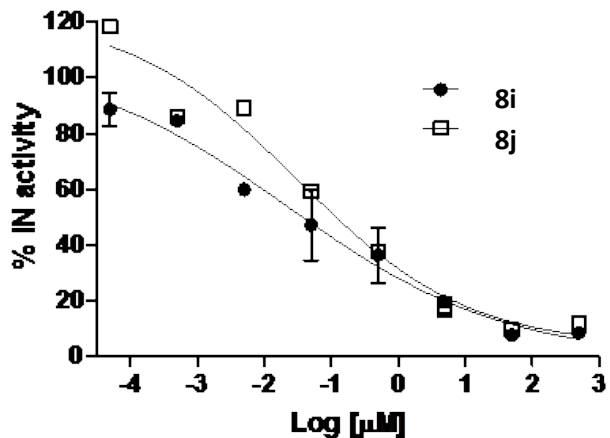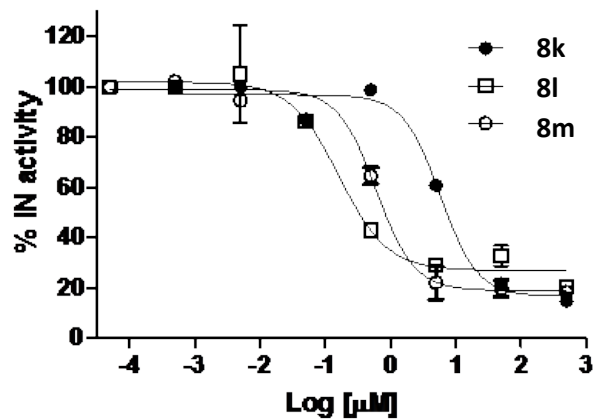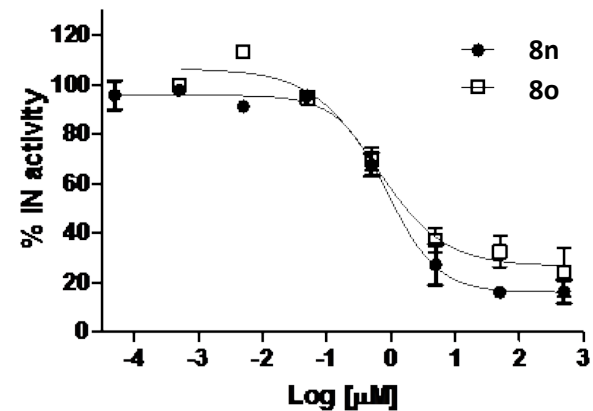

Supplement: c8md00328a1.pdf [file c8md00328a1.pdf]
